# Supplementary material for: Nsun4 and Mettl3 mediated translational reprogramming of Sox9 promotes BMSC chondrogenic differentiation
Source: PubMed Central journal article supplement (PMC9133052; doi:10.1038/s42003-022-03420-x), 2022-05-25
Supplement: 42003_2022_3420_MOESM2_ESM.pdf [file 42003_2022_3420_MOESM2_ESM.pdf]

**Nsun4 and Mettl3 mediated translational reprogramming of  
Sox9 promotes BMSC chondrogenic differentiation**

## Supplementary Figures

### Supplementary Figure 1. The m<sup>5</sup>C and m<sup>6</sup>A levels during chondrogenic differentiation.

**a**

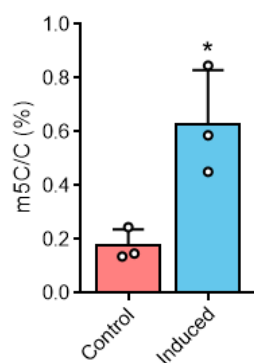

**b**

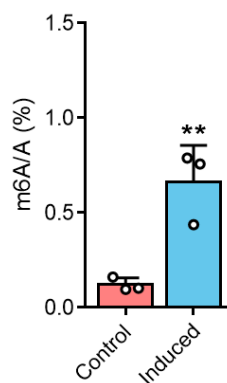

**a, b** The m<sup>5</sup>C/C ratio **a** and m<sup>6</sup>A/A ratio **b** of the mRNA were determined by LC-MS/MS after chondrogenic differentiation. Data are presented as means  $\pm$  SD from three independent experiments. \* P < 0.05, \*\*p < 0.01, by Student's t test.

**Supplementary Figure 2. The role of Nsun4 and Mettl3 during chondrogenic differentiation.**

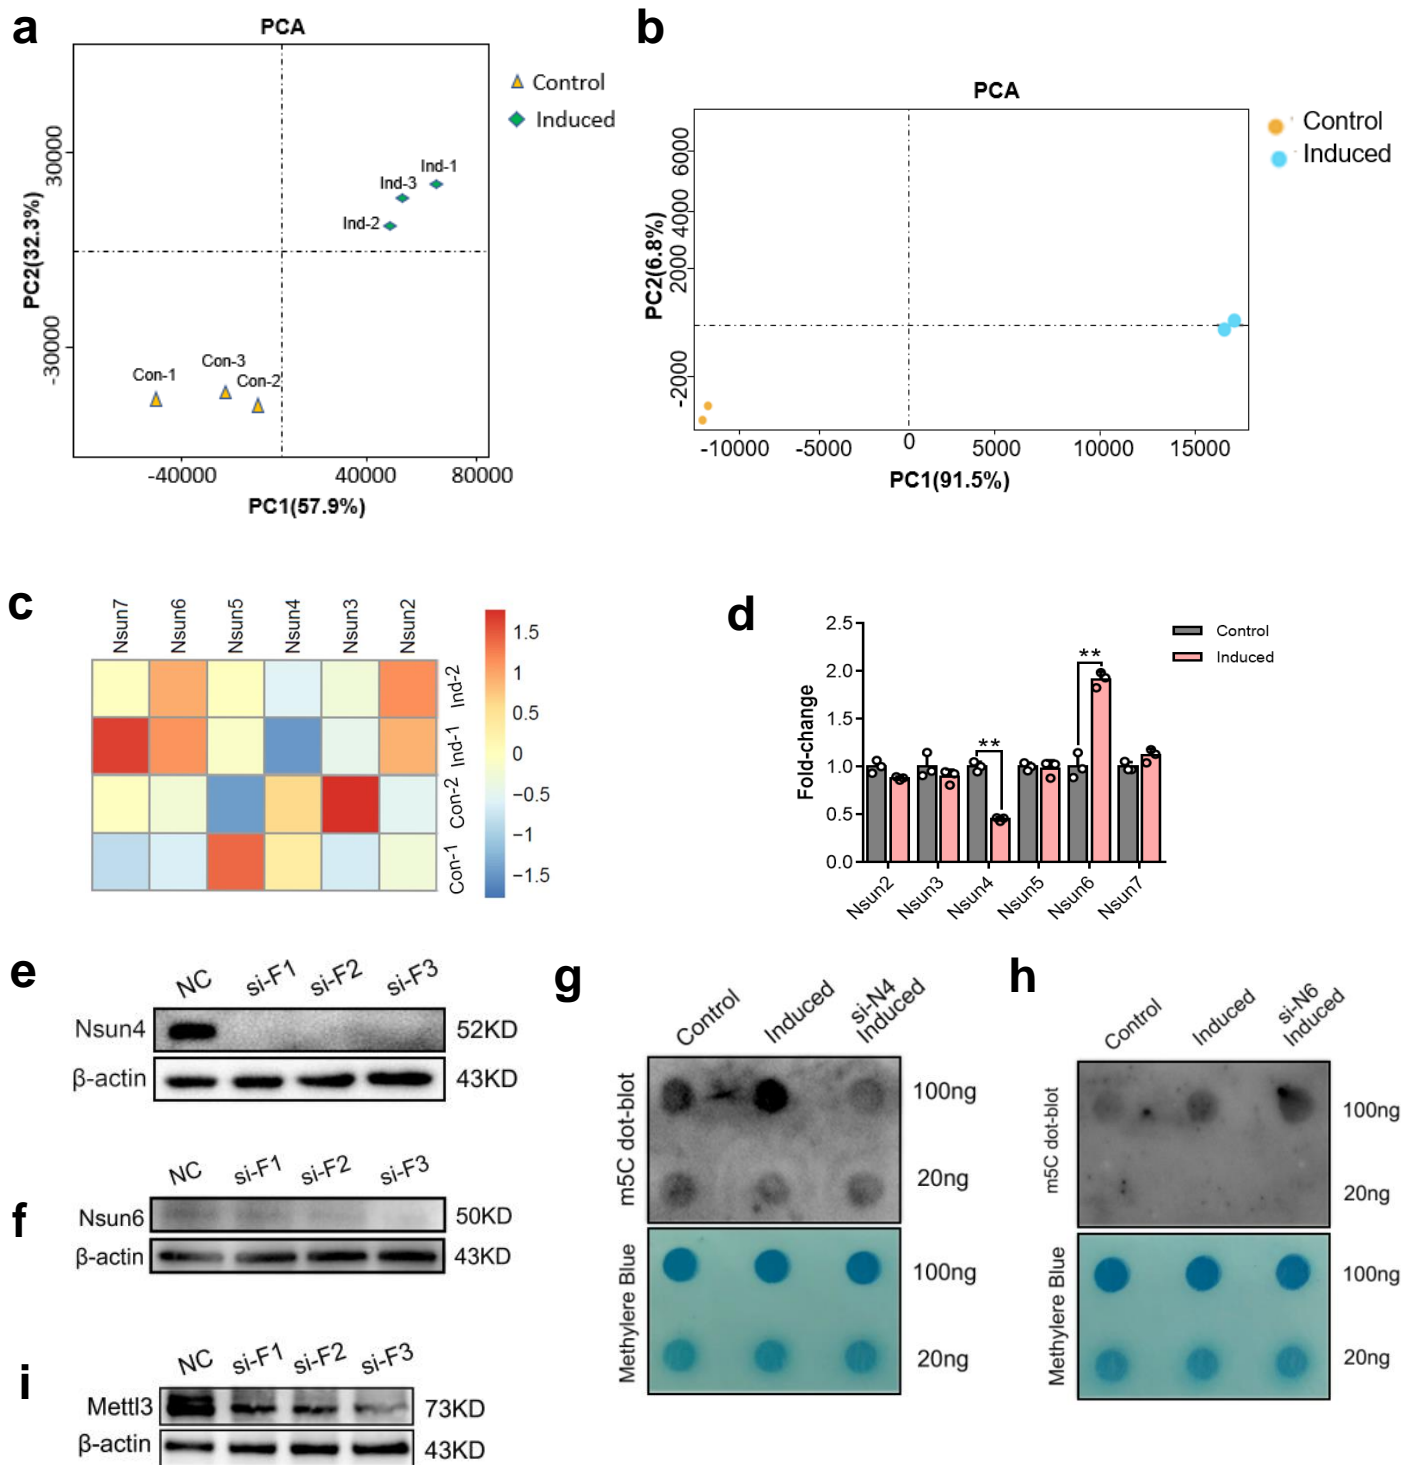

**a, b** Principal component analysis (PCA) of ribosome profiling (**a**) and RNA-sequencing (**b**) libraries from the control cells and BMSCs cultured in chondrogenic induce medium for 7 days (n=3 for ribosome profiling and n=2 for RNA-sequencing). **c** Nsun2-7 mRNAs were detected by RNA-seq. Heat maps show the differential expression fold ( $\log_2$  Rario) for Nsun2-7 mRNAs between control and induced group. **d** NSUN2-7 mRNA expression on chondrogenic differentiation tested by RT-qPCR. **e, f, i** Western blot analysis of Nsun4 (**e**), Nsun6 (**f**) and Mettl3 (**i**) in BMSCs transfected with the indicated siRNAs. **g, h** m<sup>5</sup>C dot blot of the Nsun4 knockdown (**g**) and Nsun6 knockdown (**h**) BMSCs undergoing chondrogenic differentiation. Data are presented as means  $\pm$  SD from three independent experiment. \* P < 0.05, \*\*p < 0.01, \*\*\*p < 0.001 compared with the control group by Student's t test.

**Supplementary Figure 3. Nsun4 and Mettl3 stable each other during chondrogenic differentiation .**

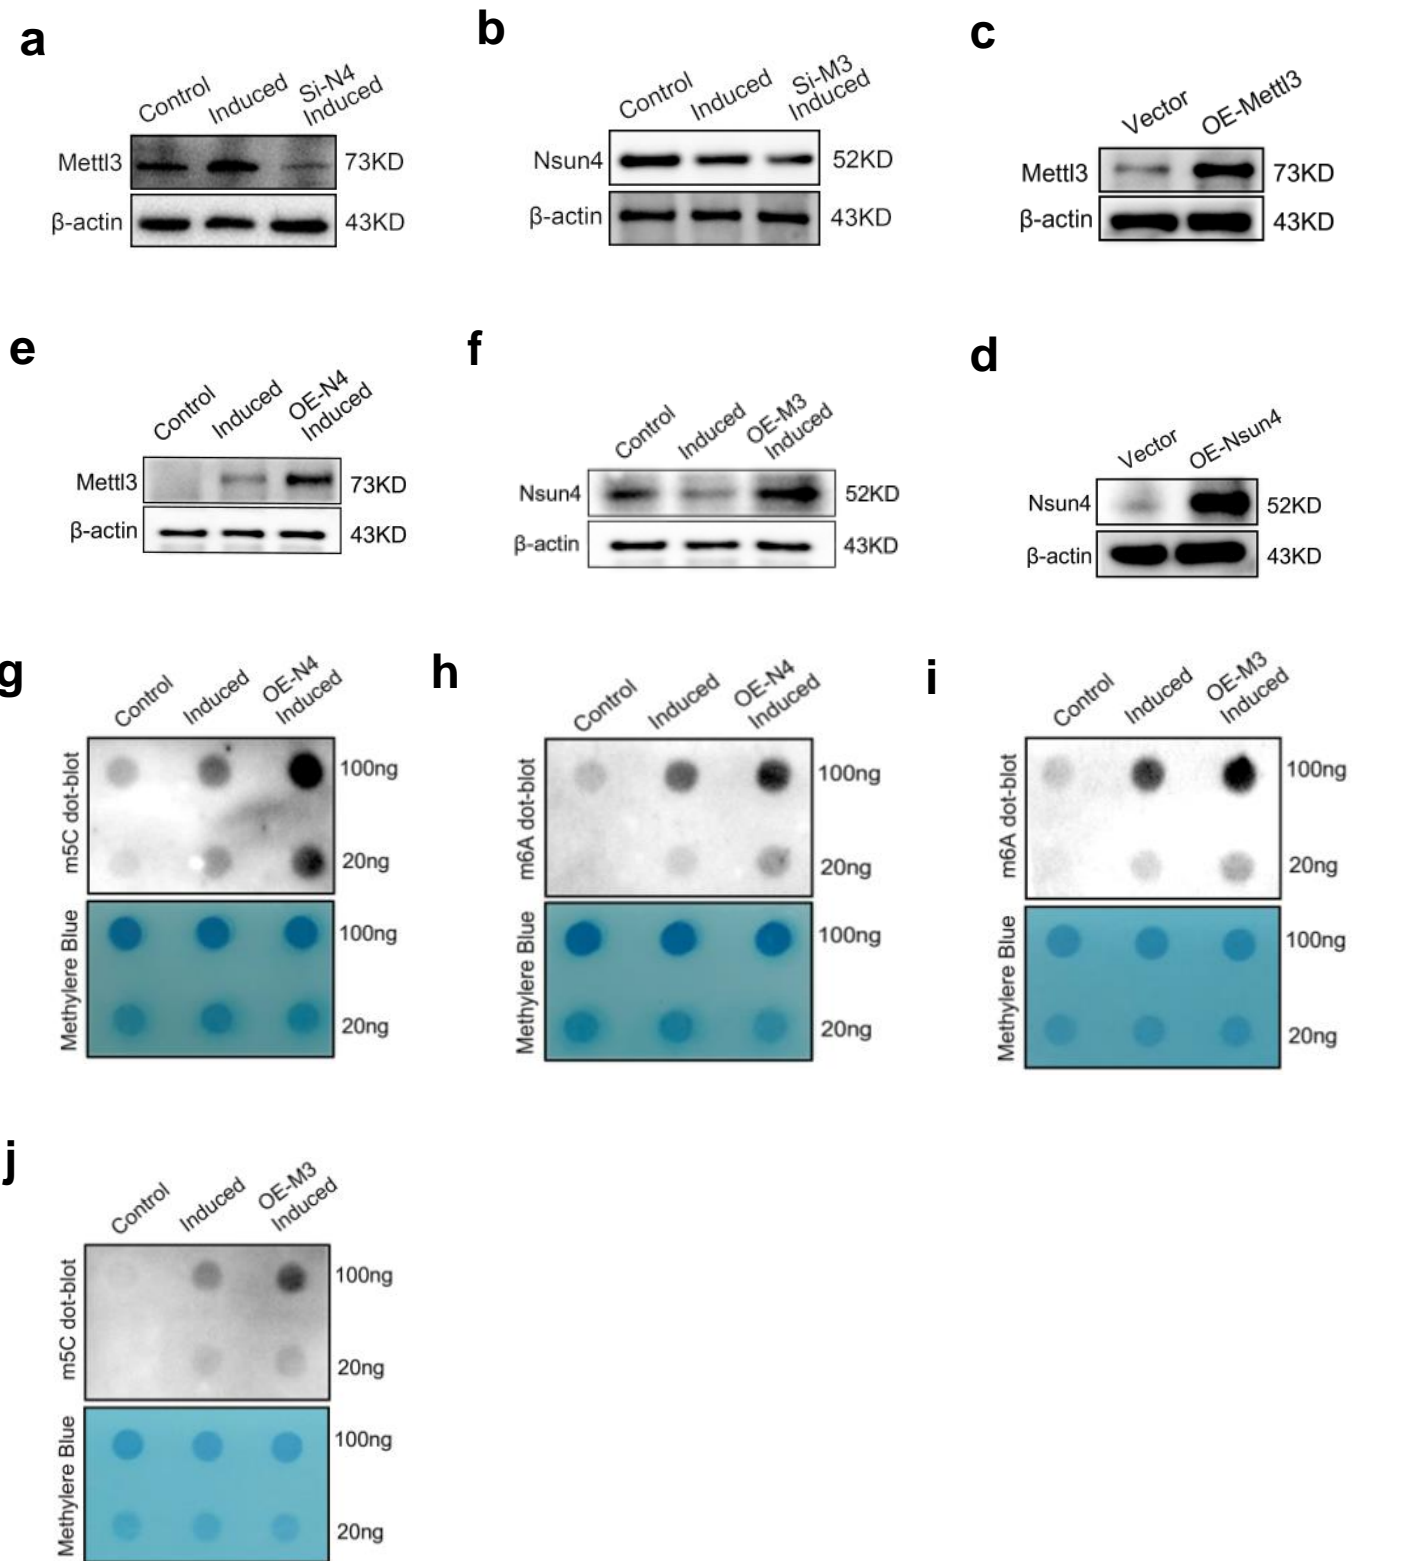

**a, e** Protein expressions of Mettl3 in Nsun4 knockdown (**a**) and overexpressed (**e**) BMSCs after 7 days of chondrogenic induction. **b, f** Protein expressions of Nsun4 in Mettl3 knockdown (**b**) and overexpressed (**f**) BMSCs after 7 days of chondrogenic induction. **c, d** Verification of the efficiency of Mettl3 or Nsun4-carrying adenovirus (OE-Mettl3 or OE-Nsun4) to induce Mettl3 (**c**) or Nsun4 (**d**) overexpression at the protein level after adenovirus infection in BMSCs. **g-j** Dot blot analysis of m<sup>5</sup>C (**g, j**) and m<sup>6</sup>A (**h, i**) in total mRNA of the BMSCs infected with adenovirus of Mettl3 or Nsun4 after induction for 7days.

## Supplementary Figure 4. The efficiency of RNA bisulfite conversion treatment.

**a**

### Untreated Results:

4329-gggccucacg auccuucuga ccuuuugggu uuuuagcagg aggugucaga aaaguuacca  
 4389-cagggauaac uggcuugugg cggccaagcg uucauagcga cgucgcuuuu ugauccuuCg  
 4449-augucggcuc uuccuaucau ugugaagcag aauucaccaa gcuuuggauu guucaccac  
 4509-uaauagggaa cgugagcugg

### Treated Results:

4329-ggguuuuuau auuuuuuuga uuuuuugggu uuuuaguagg agguguuaga aaaguuuuua  
 4389-uagggauaa ugguuugugg ugguuuagug uuuauaguga uguuguuuuu ugauuuuuCg  
 4449-auguugguuu uuuuuuuuuu ugugaaguag aauuuuuuuu guuguuggauu guuuuuuuuu  
 4509-uaauagggaa ugugaguugg

**b**

### Conversion Efficiency (C to T): C: 99.5%

1 100

1- GGGT TTTATGAT TTTTTGA TTTTTGGG TTTAAGTAGGAGGTGTTAGAAAAGTTATT ATAGGGATAATTGG TTTGTGGTGGTT AAGTGTATAGTGA  
 2- GGGT TTTATGAT TTTTTGA TTTTTGGG TTTAAGTAGGAGGTGTTAGAAAAGTTATT ATAGGGATAATTGG TTTGTGGTGGTT AAGTGTATAGTGA  
 3- GGGT TTTATGAT TTTTTGA TTTTTGGG TTTAAGTAGGAGGTGTTAGAAAAGTTATT ATAGGGATAATTGG TTTGTGGTGGTT AAGTGTATAGTGA  
 4- GGGT TTTATGAT TTTTTGA TTTTTGGG TTTAAGTAGGAGGTGTTAGAAAAGTTATT ATAGGGATAATTGG TTTGTGGTGGTT AAGTGTATAGTGA  
 5- GGGT TTTATGAT TTTTTGA TTTTTGGG TTTAAGTAGGAGGTGTTAGAAAAGTTATT ATAGGGATAATTGG TTTGTGGTGGTT AAGTGTATAGTGA  
 6- GGGT TTTATGAT TTTTTGA TTTTTGGG TTTAAGTAGGAGGTGTTAGAAAAGTTATT ATAGGGATAATTGG TTTGTGGTGGTT AAGTGTATAGTGA  
 7- GGGT TTTATGAT TTTTTGA TTTTTGGG TTTAAGTAGGAGGTGTTAGAAAAGTTATT ATAGGGATAATTGG TTTGTGGTGGTT AAGTGTATAGTGA  
 8- GGGT TTTATGAT TTTTTGA TTTTTGGG TTTAAGTAGGAGGTGTTAGAAAAGTTATT ATAGGGATAATTGG TTTGTGGTGGTT AAGTGTATAGTGA  
 9- GGGT TTTATGAT TTTTTGA TTTTTGGG TTTAAGTAGGAGGTGTTAGAAAAGTTATT ATAGGGATAATTGG TTTGTGGTGGTT AAGTGTATAGTGA  
 10- GGGT TTTATGAT TTTTTGA TTTTTGGG TTTAAGTAGGAGGTGTTAGAAAAGTTATT ATAGGGATAATTGG TTTGTGGTGGTT AAGTGTATAGTGA

Orig. - GGG**C**CT**C**AGAT**C**CT**T**CTGA**C**TTTTGGGTTTTAAG**C**AGGAGGTGT**C**AGAAAAGTTA**CC**A**C**AGGGATAA**C**TGG**C**TTGTGG**C**GG**CC**AAG**C**GT**C**CATAG**C**GA

101 200

1- TGTT GTTTTTGA TTTT**C**GATGTTGGTTTTTT TATTATTGTAAGTAGAA TTTATT AAGTGTGGATTG TTTATTT ATTAATAGGG AATGTGAGTTGG  
 2- TGTT GTTTTTGA TTTT**C**GATGTTGGTTTTTT TATTATTGTAAGTAGAA TTTATT AAGTGTGGATTG TTTATTT ATTAATAGGG AATGTGAGTTGG  
 3- TGTT GTTTTTGA TTTT**C**GATGTTGGTTTTTT TATTATTGTAAGTAGAA TTTATT AAGTGTGGATTG TTTATTT ATTAATAGGG AATGTGAGTTGG  
 4- TGTT GTTTTTGA TTTT**C**GATGTTGGTTTTTT TATTATTGTAAGTAGAA TTTATT AAGTGTGGATTG TTTATTT ATTAATAGGG AATGTGAGTTGG  
 5- TGTT GTTTTTGA TTTT**C**GATGTTGGTTTTTT TATTATTGTAAGTAGAA TTTATT AAGTGTGGATTG TTTATTT ATTAATAGGG AATGTGAGTTGG  
 6- TGTT GTTTTTGA TTTT**C**GATGTTGGTTTTTT TATTATTGTAAGTAGAA TTTATT AAGTGTGGATTG TTTATTT ATTAATAGGG AATGTGAGTTGG  
 7- TGTT GTTTTTGA TTTT**C**GATGTTGGTTTTTT TATTATTGTAAGTAGAA TTTATT AAGTGTGGATTG TTTATTT ATTAATAGGG AATGTGAGTTGG  
 8- TGTT GTTTTTGA TTTT**C**GATGTTGGTTTTTT TATTATTGTAAGTAGAA TTTATT AAGTGTGGATTG TTTATTT ATTAATAGGG AATGTGAGTTGG  
 9- TGTT GTTTTTGA TTTT**C**GATGTTGGTTTTTT TATTATTGTAAGTAGAA TTTATT AAGTGTGGATTG TTTATTT ATTAATAGGG AATGTGAGTTGG  
 10- TGTT GTTTTTGA TTTT**C**GATGTTGGTTTTTT TATTATTGTAAGTAGAA TTTATT AAGTGTGGATTG TTTATTT ATTAATAGGG AATGTGAGTTGG

Orig. - **CGT****CG**TTTTT**GAT****CC****T****C**GATGT**CGG****C****T****C****C**TAT**C**ATTGTGAAG**C**AGAATT**C****CC**AAG**C**GTTGGATTGTT**C****CC****C****A**TAATAGGGAA**C**GTGAG**C**TGG

**a** m<sup>5</sup>C sites in 28S rRNA identified by RNA-BisSeq. **b** The conversion rate of RNA-BisSeq. Highlighted **C** represents m<sup>5</sup>C, highlighted **C** represents non-converted cytosine. The original, non-converted RNA sequence with non-methylated **C** highlighted is show below the converted cDNA sequencing results for comparison.

**Supplementary Figure 5. Identification of m5C and m6A sites in Sox9 3'UTR.**

**a**

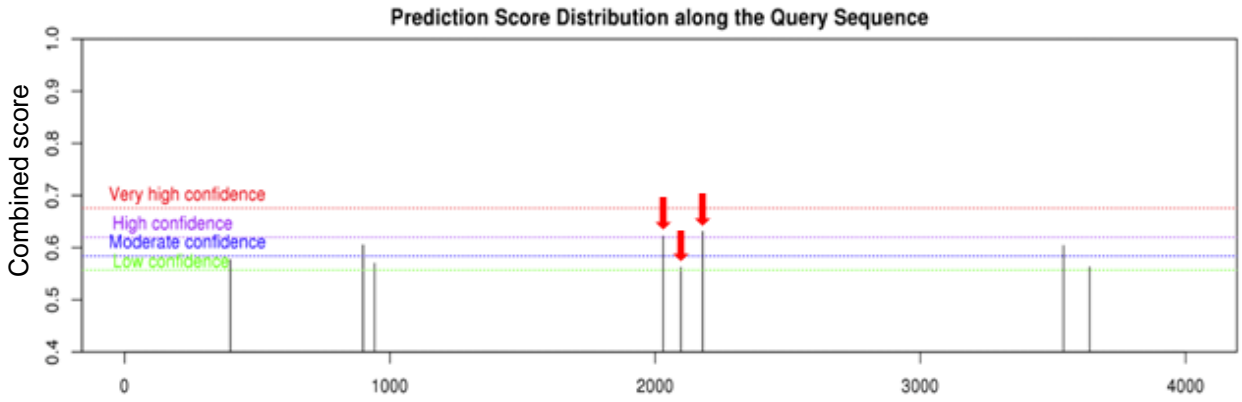

**b**

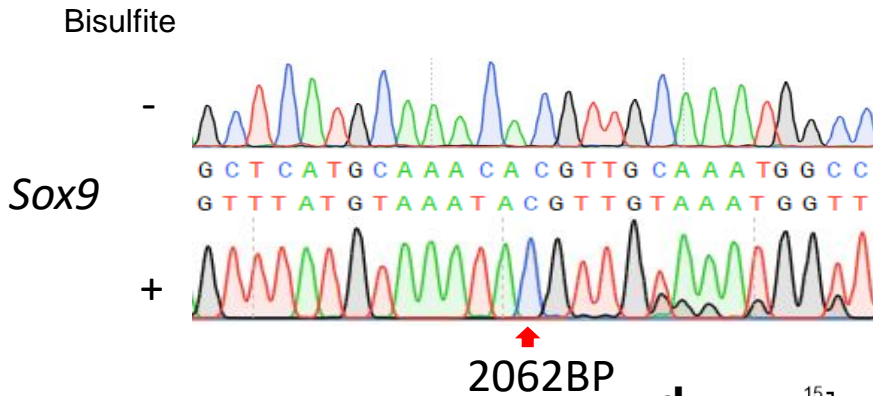

**c**

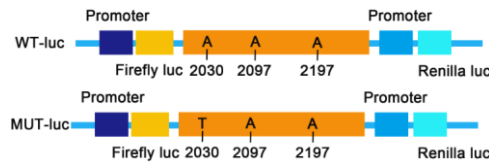

**d**

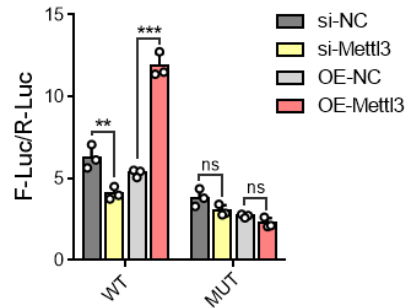

**e**

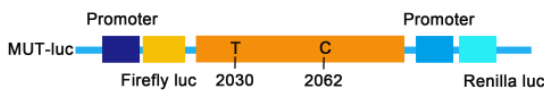

**f**

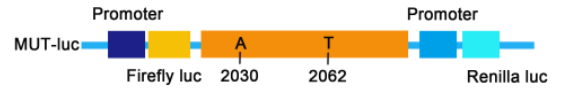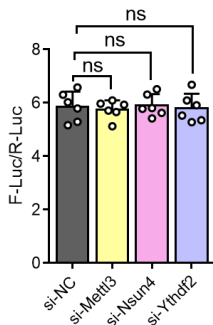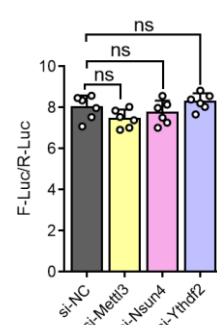

**a** Predicted sites for m<sup>6</sup>A modification in the sequence of Sox9 gene. **b** m<sup>5</sup>C sites in 3'UTR of Sox9 identified by RNA-BisSeq. **c** Schematic depiction of Sox9 3'UTR wide type (WT-luc) and mut type (MUT-luc) reporters. For the mut type (MUT-luc), A to T was made in the 2030nt. **d** Relative dual-luciferase reporter activity of wide (WT-luc) or mutated (MUT-luc) reporters in 293T cells with knock-down and overexpressed Mettl3. **e, f** Schematic diagram of Sox9 3'UTR MUT-luc reporters. The MUT-luc, A or C to T substitutions were made (up). Relative dual-luciferase reporter activity of Mut-luc reporter in 293T cells with ectopically expressed Mettl3, Nsun4 and Ythdf2 respectively (down). Data are presented as means  $\pm$  SD from three or six independent experiment. \*  $P < 0.05$ , \*\* $p < 0.01$ , \*\*\* $p < 0.001$  compared with the negative control group by one way ANOVA and Tukey's multiple comparison tests.

**Supplementary Figure 6. The proteins interacted with Nsun4.**

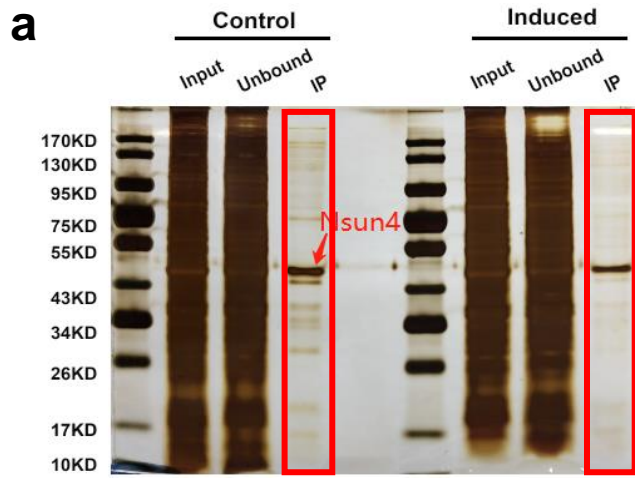

**b**

A list of identified Nsun4-interaction protein candidates

| Detected specially in BMSCs on chondrogenic differentiation |                                                                 |
|-------------------------------------------------------------|-----------------------------------------------------------------|
| Gene names                                                  | Major function                                                  |
| RPS17                                                       | translation                                                     |
| RPS25                                                       | translation                                                     |
| RPS30                                                       | translation                                                     |
| RPL39                                                       | translation                                                     |
| Rpl10a                                                      | translation                                                     |
| EF1A1                                                       | mRNA binding;<br>translation elongation factor activity         |
| Mettl3                                                      | mRNA (N6-adenosine)-methyltransferase activity;<br>mRNA binding |

**a** Silver-stained gel of affinity-purified Nsun4 complex in BMSCs undergoing chondrogenic differentiation. **b** The table of a list of protein candidates that interacted with Nsun4 protein.

Supplementary Figure 7. Protein expression and purification.

**a**

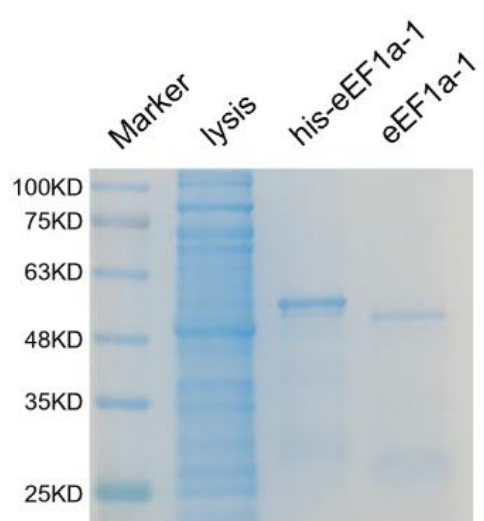

**b**

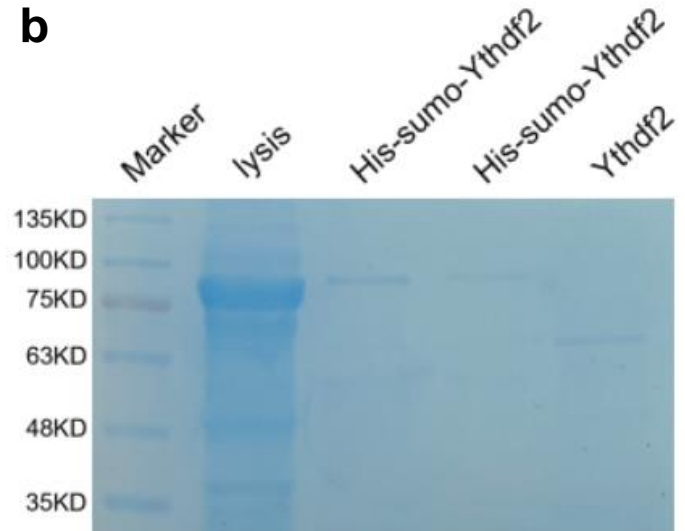

**c**

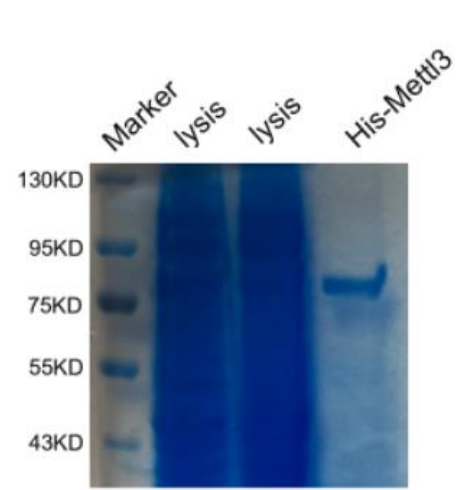

**d**

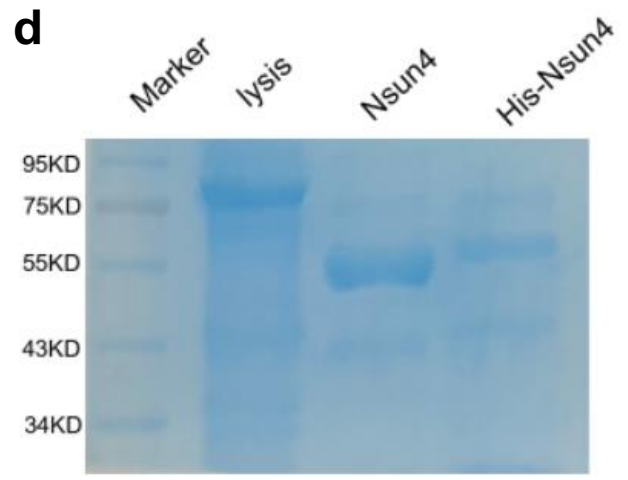

**a-d** SDS-PAGE analysis of the eEF1 $\alpha$ -1, Ythdf2, Mettl3 and Nsun4.



Supplementary Figure 7. The expression of marker genes regulated by Mettl3 and Nsun4.

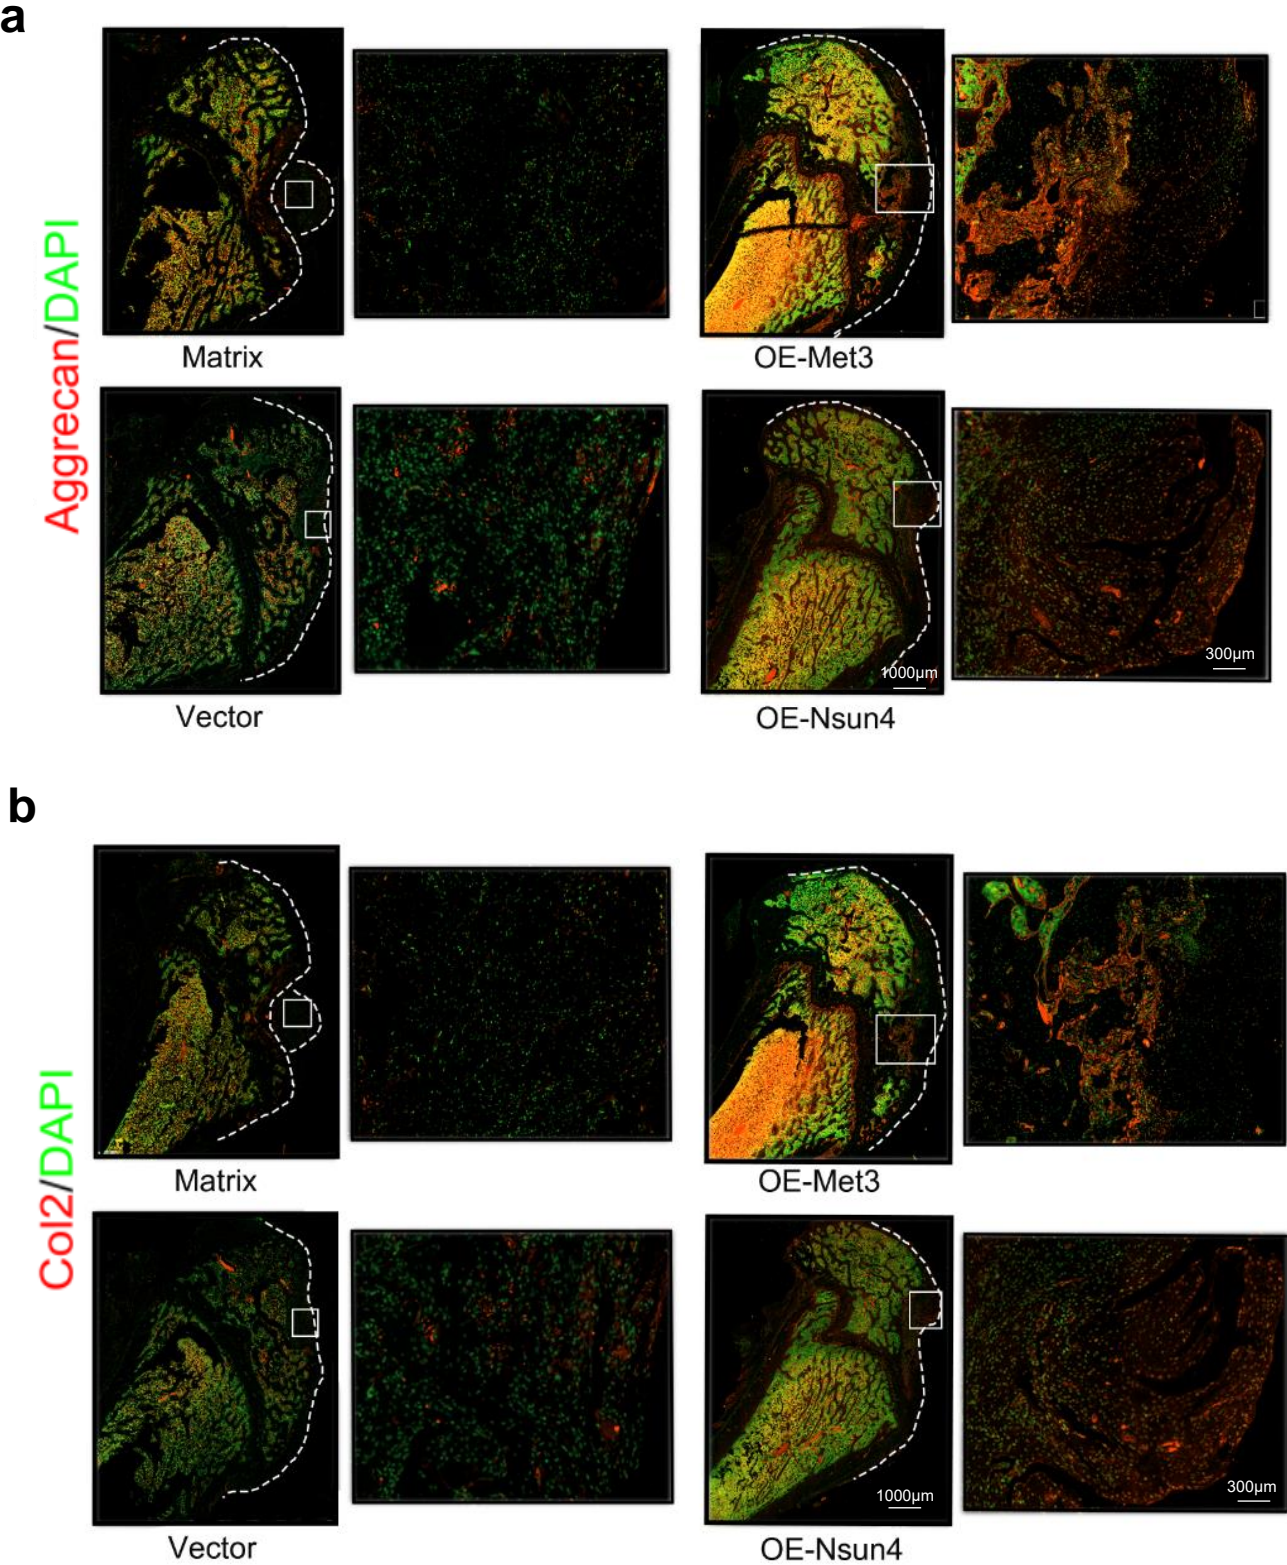

**a, b** Aggrecan (**a**) and Col2 (**b**) protein expression of repaired cartilage visualized through immunofluorescence at six weeks.

# Original Blot Scans – Main Article

## Original scans Figure 1

Figure 1b

Sox9:

Aggrecan:

Col2:

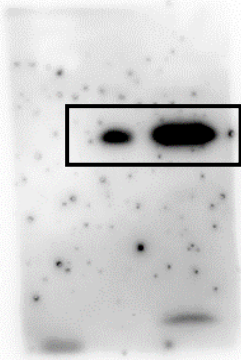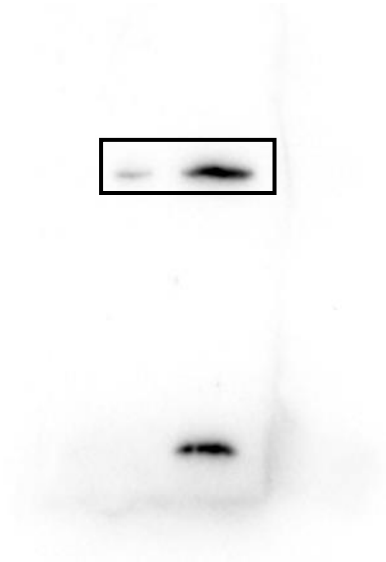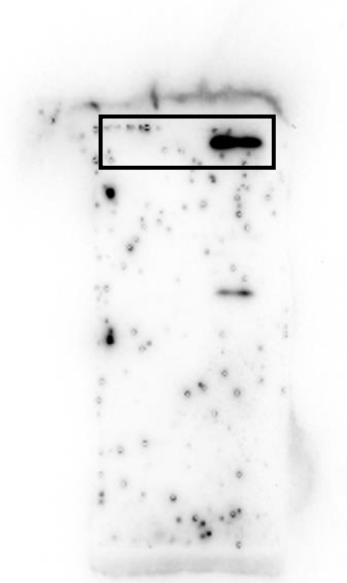

$\beta$ -actin:

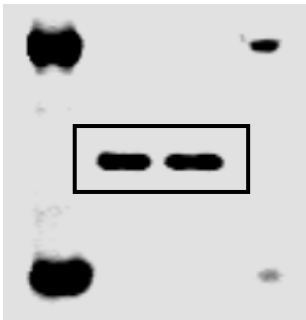

Figure 1e

$m^5C$ :

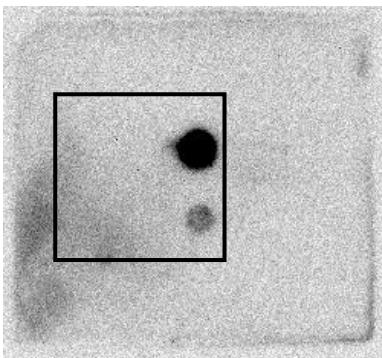

Figure 1f

$m^6A$ :

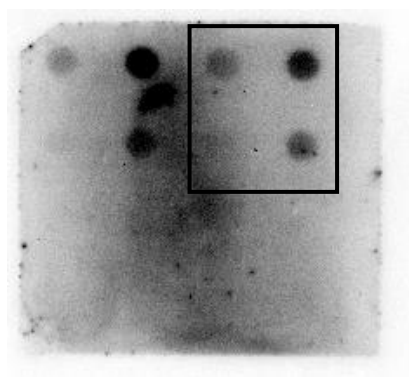

## Original scans Figure 2

Figure 2a:

Nsun4:

$\beta$ -actin:

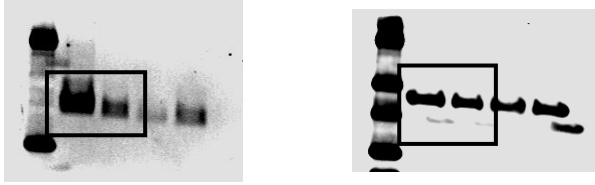

Figure 2b:

Mettl3:

$\beta$ -actin:

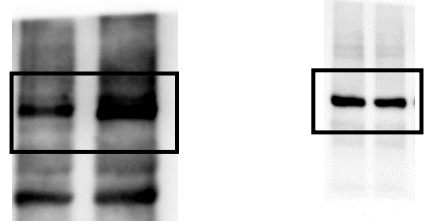

Figure 2f:

Sox9:

Aggrecan:

Col2:

$\beta$ -actin:

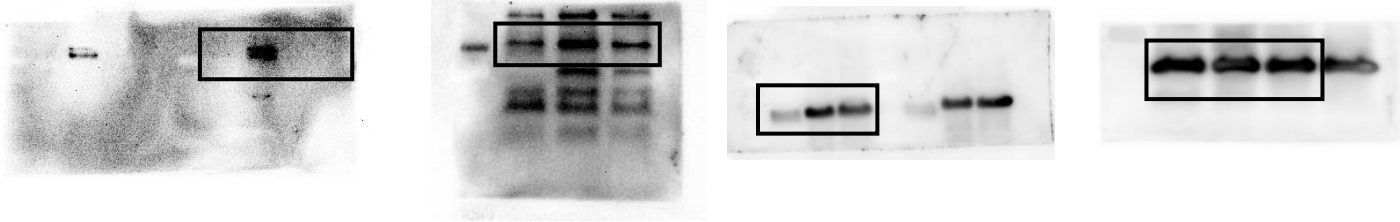

Figure 2g:

Sox9:

Aggrecan:

Col2:

$\beta$ -actin:

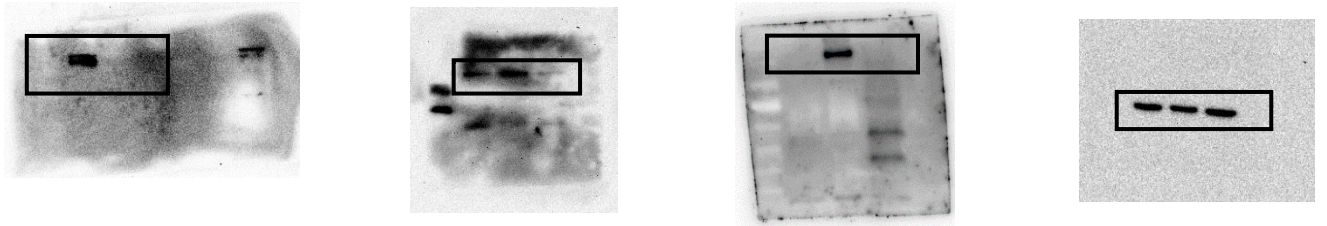

Figure 2h:

m<sup>5</sup>C:

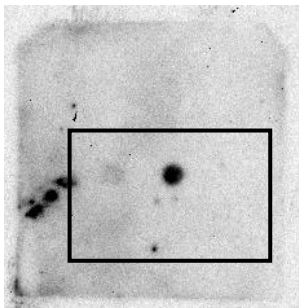

### Original scans Figure 3

Figure 3a:

IP-Mettl3:

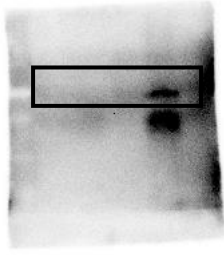

Input-Mettl3:

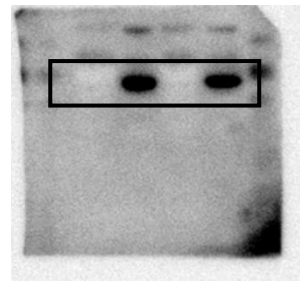

Input-Nsun4:

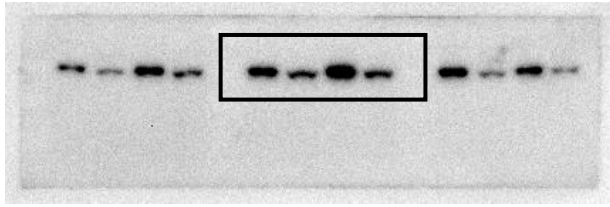

Input-  $\beta$ -actin :

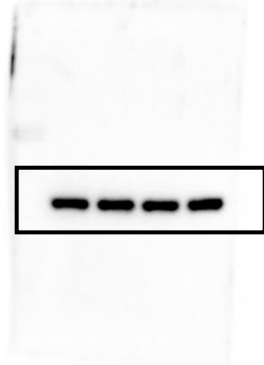

Figure 3b:

IP-Nsun4:

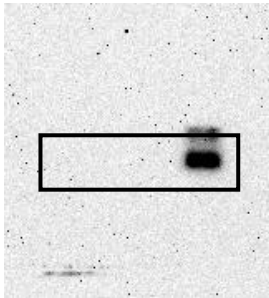

Input-Mettl3:

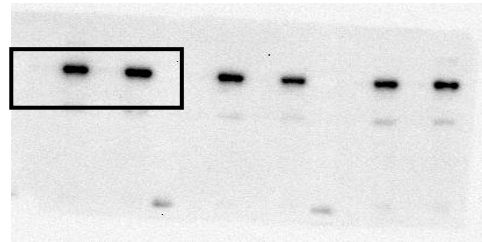

Input-Nsun4:

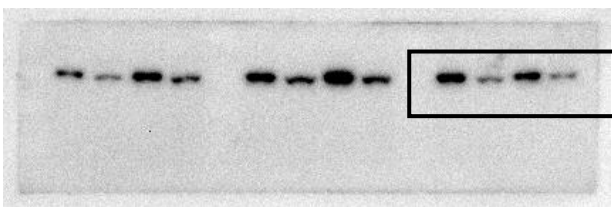

Input-  $\beta$ -actin :

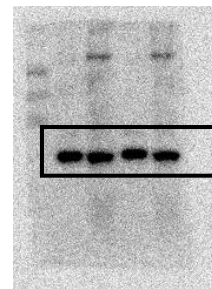

Figure 3c:

$m^5C$ :

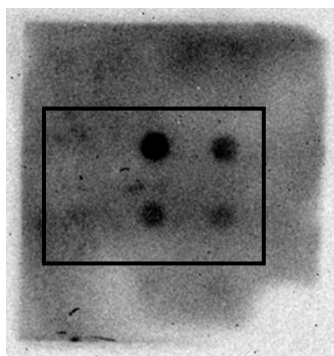

Figure 3d:

$m^6A$ :

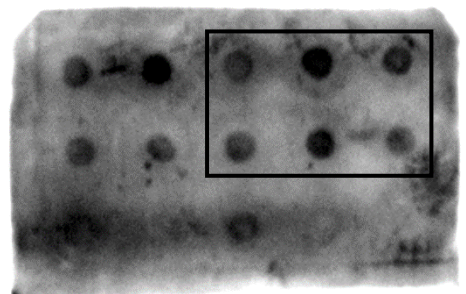

# Original scans Figure 4

Figure 4a:

IP-eEF1a-1:

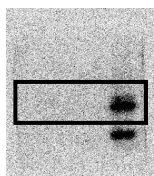

Input-Mettl3:

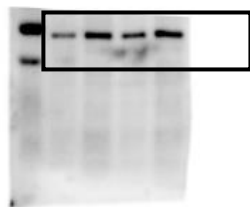

Input-eEF1a-1:

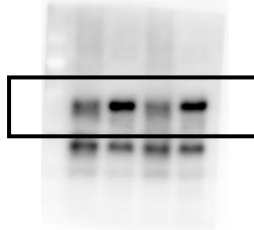

Input-  $\beta$ -actin :

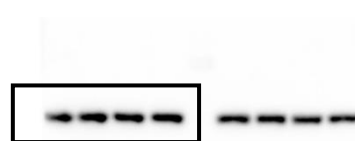

Figure 4b:

IP-eEF1a-1:

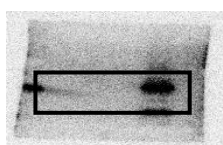

Input-eEF1a-1:

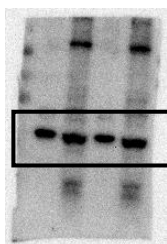

Input-Nsun4:

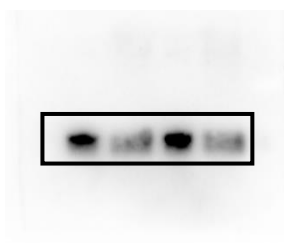

Input-  $\beta$ -actin :

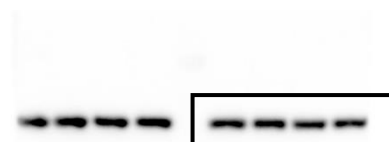

Figure 4c:

IP-Ythdf1:

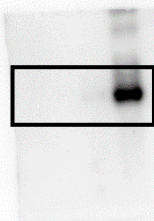

IP-Ythdf2:

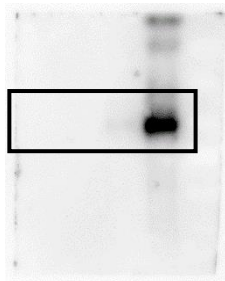

IP-Ythdf3:

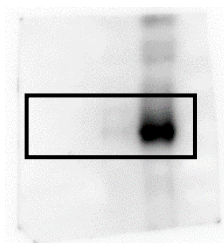

Input-Ythdf1:

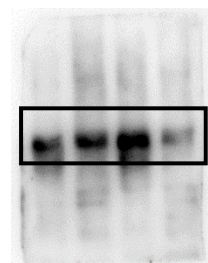

Input-Ythdf2:

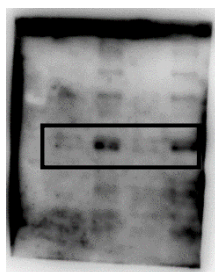

Input-Ythdf3:

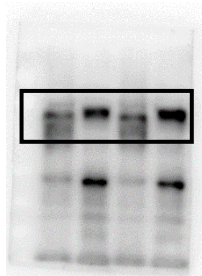

Input-Mettl3:

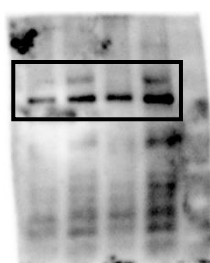

Input-  $\beta$ -actin :

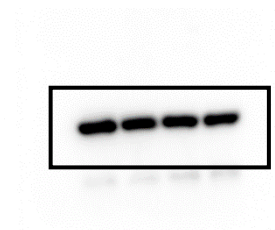

Figure 4d:

IP-Ythdf2:

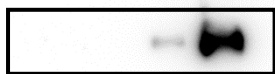

Input-Ythdf1:

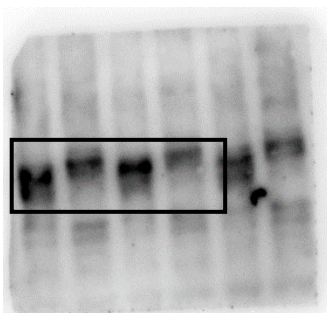

Input-Ythdf2:

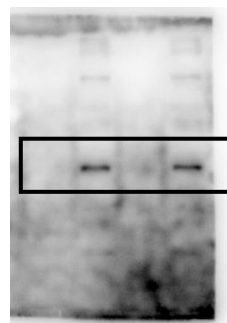

Input-Ythdf3:

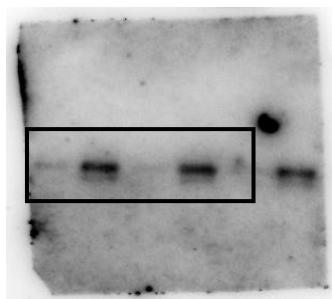

Input-Nsun4:

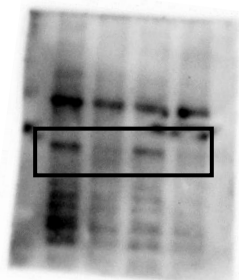

Input-  $\beta$ -actin :

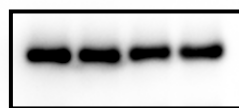

Figure 4e:

Sox9:

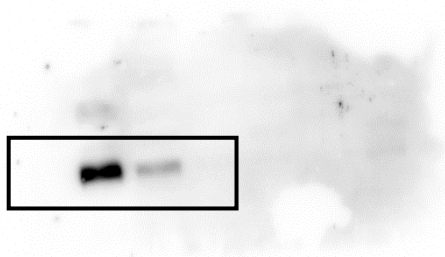

$\beta$ -actin:

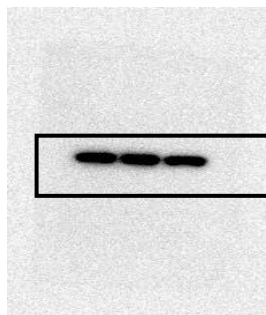

Figure 4e

Mettl3:

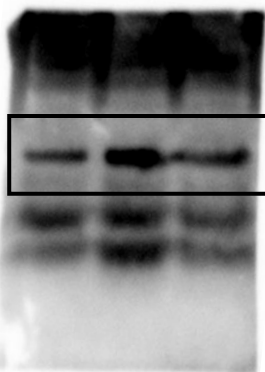

Nsun4

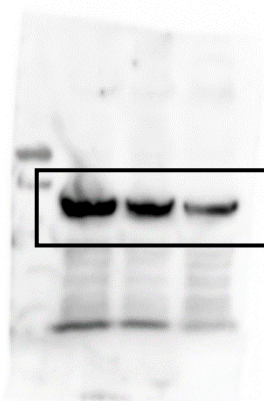

B-actin:

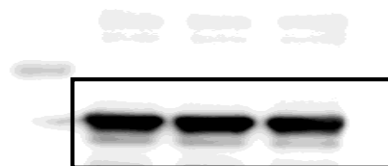

# Original scans Supplementary Figure 1

Supplementary Figure 1e:

Nsun4:

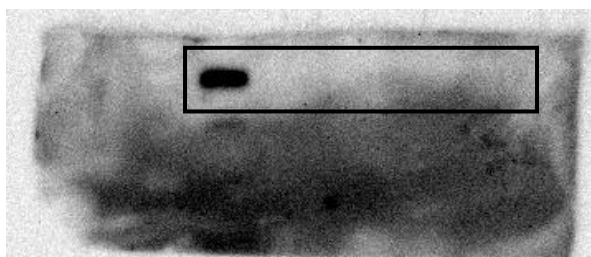

$\beta$ -actin:

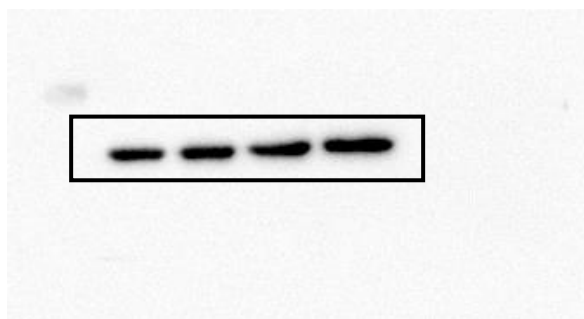

Supplementary Figure 1f:

Nsun6:

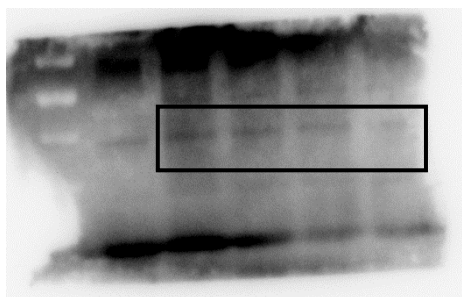

$\beta$ -actin:

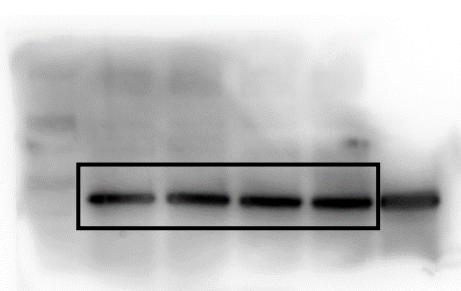

Supplementary Figure 1g:

Mettl3:

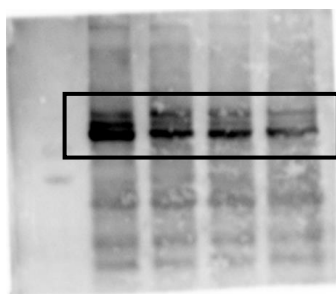

$\beta$ -actin:

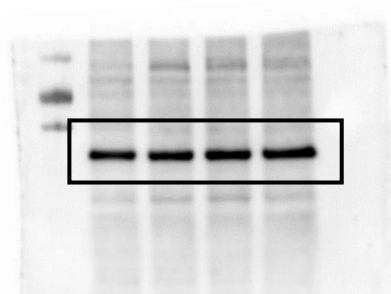

Supplementary Figure 1h:

$m^5C$ :

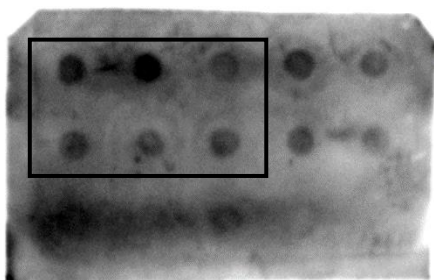

Supplementary Figure 1i:

$m^6A$ :

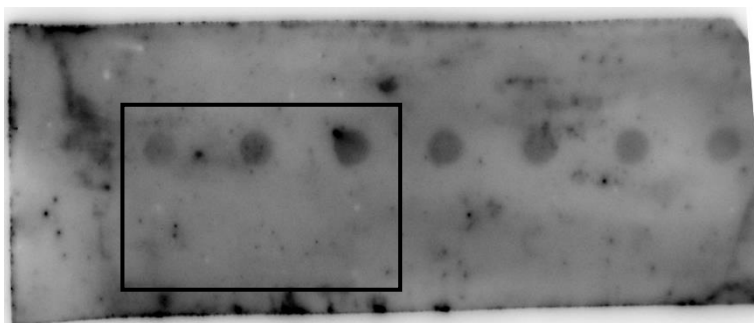

**Original scans Supplementary Figure 3**

Supplementary Figure 3a:

Mettl3:

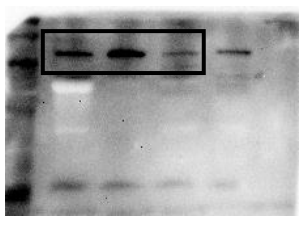

$\beta$ -actin:

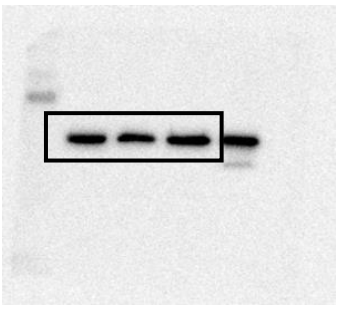

Supplementary Figure 3b:

Nsun4:

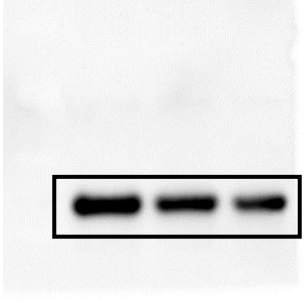

$\beta$ -actin:

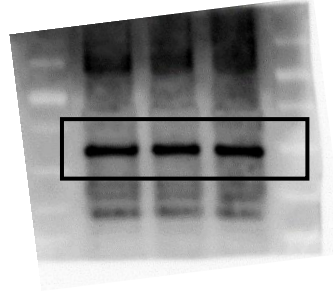

Supplementary Figure 3c:

Mettl3:

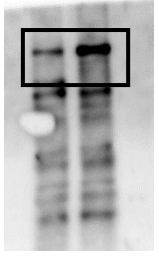

$\beta$ -actin:

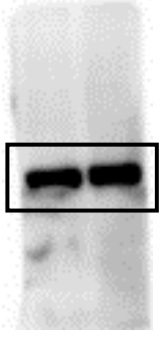

Supplementary Figure 3d:

Nsun4:

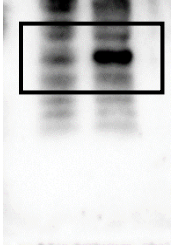

$\beta$ -actin:

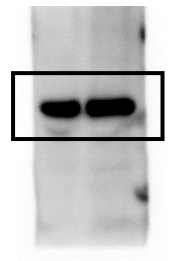

Supplementary Figure 3e:

Mettl3:

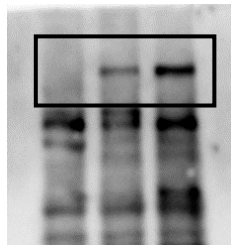

$\beta$ -actin:

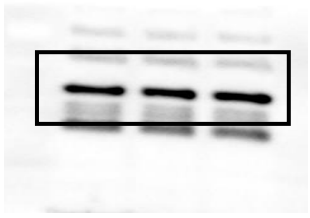

Supplementary Figure 3f:

Nsun4:

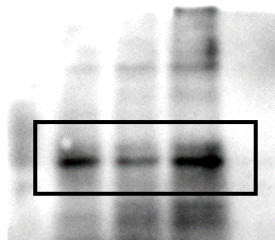

$\beta$ -actin:

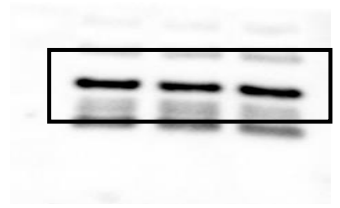

Supplementary Figure 3g-h:

$m^5C$ :

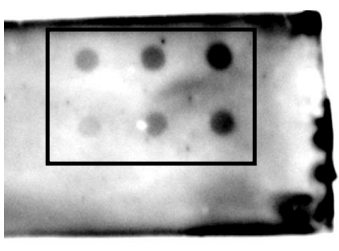

$m^6A$ :

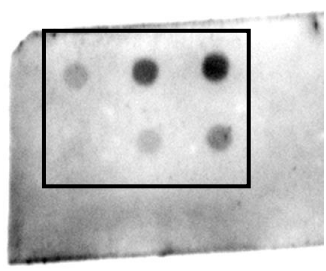

Supplementary Figure 3i-j:

$m^6A$ :

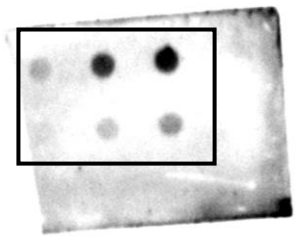

$m^5C$ :

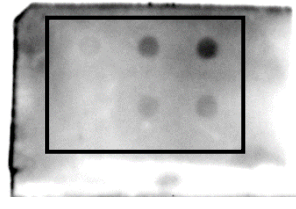



## Supplementary Table

### Supplementary Table 1. Primer sequences

| Primers of Real-time PCR        |         |                                         |
|---------------------------------|---------|-----------------------------------------|
| Sox9                            | Forward | TCAACGGCTCCAGCAAGAACAAG                 |
|                                 | Reverse | CTCCGCCTCCTCCACGAAGG                    |
| Aggrecan                        | Forward | CTGATCCACTGTCCAAGCACCATG                |
|                                 | Reverse | ATCCACGCCAGGCTCCACTC                    |
| Col2                            | Forward | ACGCTCAAGTCGCTGAACAACC                  |
|                                 | Reverse | ATCCAGTAGTCTCCGCTCTTCCAC                |
| Mettl3                          | Forward | CACGCTGCCTCAGATGTTGACC                  |
|                                 | Reverse | CTGACCTTCTTGCTCTGCTGTTCC                |
| Nsun2                           | Forward | CGCATCCAGCATTCTAGACTCAC                 |
|                                 | Reverse | CGCCACTGCAAGGGACATCAC                   |
| Nsun3                           | Forward | CTTGCTCTTGCGGGGCTATCAC                  |
|                                 | Reverse | TCGGTCTGGAGTTCGGCTGAG                   |
| Nsun4                           | Forward | CATGTACCACGGACCGCCATTC                  |
|                                 | Reverse | CAAGGAGTCCAGCCGCAAGAAG                  |
| Nsun5                           | Forward | TCACTGGCGGCTTCTTCATTGC                  |
|                                 | Reverse | TTGGTGCTTTGCTGAGAGGTTCTG                |
| Nsun6                           | Forward | AGGAACCACAGATCGGAGGAGAAG                |
|                                 | Reverse | AGGCACAACACACGGGTCAAAG                  |
| Nsun7                           | Forward | CCAATGACGCAGTGACCATACCAG                |
|                                 | Reverse | CAATGCCGCAGCCAACCTTTGTC                 |
| β-actin                         | Forward | TGTCACCAACTGGGACGATA                    |
|                                 | Reverse | GGGGTGTGAAGGTCTCAA                      |
| Primers of RIP-qPCR             |         |                                         |
| Sox9                            | Forward | TCAACGGCTCCAGCAAGAACAAG                 |
|                                 | Reverse | CTCCGCCTCCTCCACGAAGG                    |
| Sox9 3'UTR                      | Forward | GGAAAGCCAAGGGCAAGGA                     |
|                                 | Reverse | CAGGCAACCAGGGGCAAAT                     |
| Sox9 m6A site:                  | Forward | CTTGAAGAGCAATGGTGACAGAGTTGATC           |
|                                 | Reverse | TTGCATGAGCTCAGATAATGTCTTAAA             |
| Primers of Bisulfite sequencing |         |                                         |
| Sox9 3'UTR<br>Normal primer     | Forward | AGCTCACCAGACCCTGAGGAGACCTTGAAGAG        |
|                                 | Reverse | TTCTCACTGACGCTGGTGGGTCCATCTGCC          |
| Sox9 3'UTR<br>Specific primer   | Forward | AGTTTATTAGATTTTGAGGAGATTTTGAAGAG        |
|                                 | Reverse | TTCTCACTAACRCTAATAAATCCATCTAAC (R=G/A)  |
| 28S<br>Normal primer            | Forward | GGGGCCTCACGATCCTTCTGACCTTTTGGG          |
|                                 | Reverse | CCAGCTCACGTTCCCTATTAGTGGGTGAAC          |
| 28S<br>Specific primer          | Forward | GGGGTTTTAYGATTTTTTTGATTTTTTTGGG (Y=C/T) |
|                                 | Reverse | CCAACCTCACRTTCCCTATTAATAAATAAAC         |

## Supplementary Table 2. siRNA sequences

| siRNAs used for this study |                      |
|----------------------------|----------------------|
| eEF1 $\alpha$ -1 siRNAs #1 | GAGACTTCATCAAGAACAT  |
| eEF1 $\alpha$ -1 siRNAs #2 | AGGAAGTCAGCACCTACAT  |
| eEF1 $\alpha$ -1 siRNAs #3 | GGAAACTGGTGTCTCTCAA  |
| Ythdf2 siRNAs #1           | GGATTGACTTCTCAGCAT   |
| Ythdf2 siRNAs #2           | GGGCTGATATTGCTAGCAA  |
| Ythdf2 siRNAs #3           | GGTTCTGGATCTACTCCTT  |
| Mettl3 siRNAs #1           | GTCTATAGTCCCTGAATTAA |
| Mettl3 siRNAs #2           | CCTACAAGATGACGCACAT  |
| Mettl3 siRNAs #3           | TCTCTAAACCTAAGAACTT  |
| Nsun4 siRNAs #1            | GCAGAAGTATGGTGCACATA |
| Nsun4 siRNAs #2            | GCCTCAAGATATTAGGAAA  |
| Nsun4 siRNAs #3            | CATCAAGGTTCAAGTGGAA  |
| Nsun6 siRNAs #1            | AGCCAACAAGGATTGTATA  |
| Nsun6 siRNAs #2            | GAATGACAGAACCCATATA  |
| Nsun6 siRNAs #3            | TCATGTTCTTGATCCTCAA  |
