# Supplementary material for: Nsun4 and Mettl3 mediated translational reprogramming of Sox9 promotes BMSC chondrogenic differentiation
Source: PubMed Central journal article supplement (PMC9133052; doi:10.1038/s42003-022-03420-x), 2022-05-25
Supplement: 42003_2022_3420_MOESM3_ESM.pdf [file 42003_2022_3420_MOESM3_ESM.pdf]

## Description of Additional Supplementary Files

**File name:** Supplementary Data 1

**Description:** Containing source data for all other experiments.
